# Supplementary material for: GABA-Glycine Cotransmitting Neurons in the Ventrolateral Medulla: Development and Functional Relevance for Breathing
Source: PubMed Central journal article supplement (PMC6877658; doi:10.3389/fncel.2019.00517), 2019-11-19
Supplement: Data_Sheet_1.pdf [file Data_Sheet_1.pdf]

*Supplementary Material*

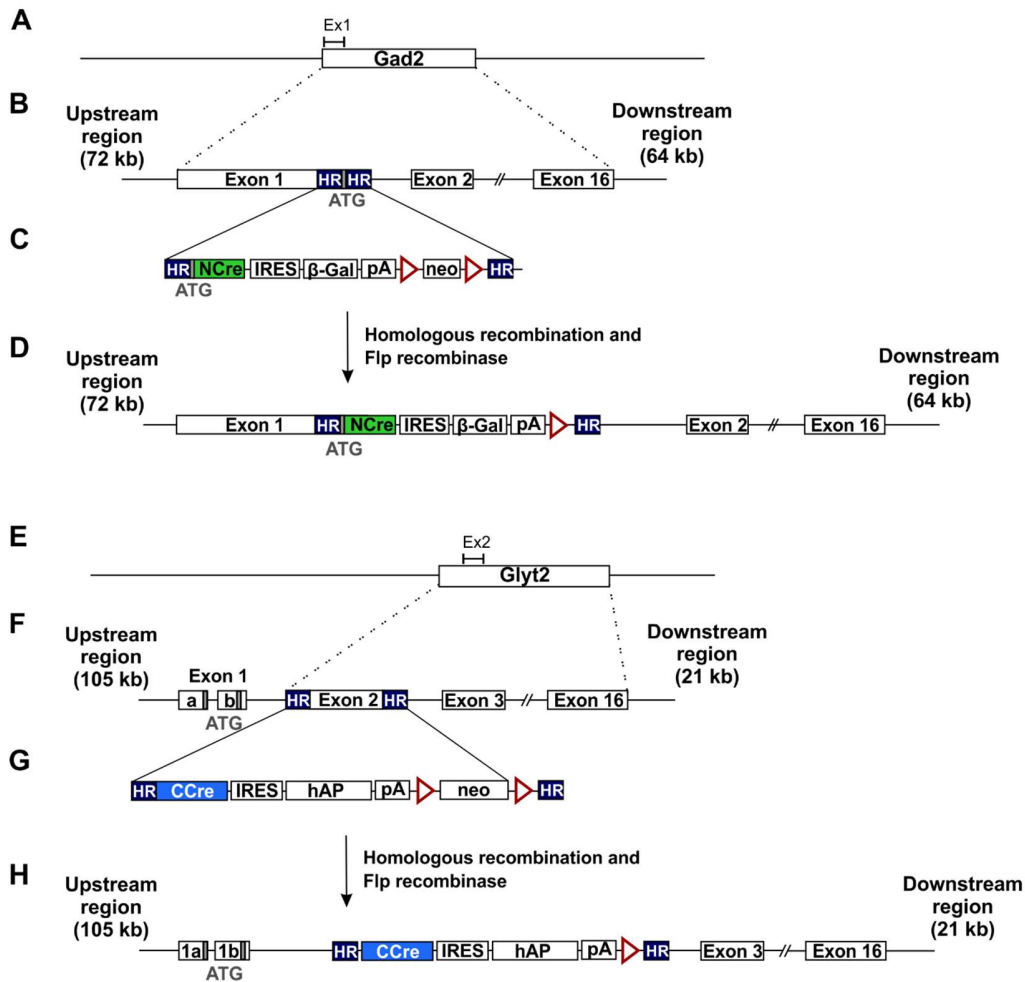

**Suppl. Fig. 1: Generation of Split-Cre and Split-CreERT2 transgenic mice targeting inhibitory neurons.** (A-D) Generation of the *Gad2* transgene constructs. (A) BAC clone RPC123-407K8 contains the entire mouse *Gad2* gene. (B) Homology regions (HR) bordering the ATG start codon of the *Gad2* gene were selected to insert the targeting construct (C) containing the NCre open reading frame (ORF) followed by an IRES, the  $\beta$ -Gal coding sequence and a SV40 poly-adenylation site (pA). After homologous recombination, the Frt site (triangles) flanked neomycin selection cassette was removed by Flp mediated recombination yielding the final transgene construct (D). To generate the *Gad2*-NCreERT2 transgene construct, the same strategy was used, but the NCre ORF was replaced by the NCreERT2 ORF. (E-H) Generation of the *Glyt2* transgene constructs (official gene symbol *Slc6a5*). (E) BAC clone RP23-365E4 contains the whole mouse *Glyt2* gene. (F) Homology regions (HR) were selected within exon 2 of the *Glyt2* gene to insert the targeting construct (G) containing the CCre ORF followed by an IRES, the coding sequence for human alkaline phosphatase (hAP) and the pA. The neomycin selection cassette was removed as above generating the final transgene construct (H). To generate the *Glyt2*-ERT2CCre transgene construct, the same strategy was used, but the CCre ORF was replaced by the ERT2CCre ORF.

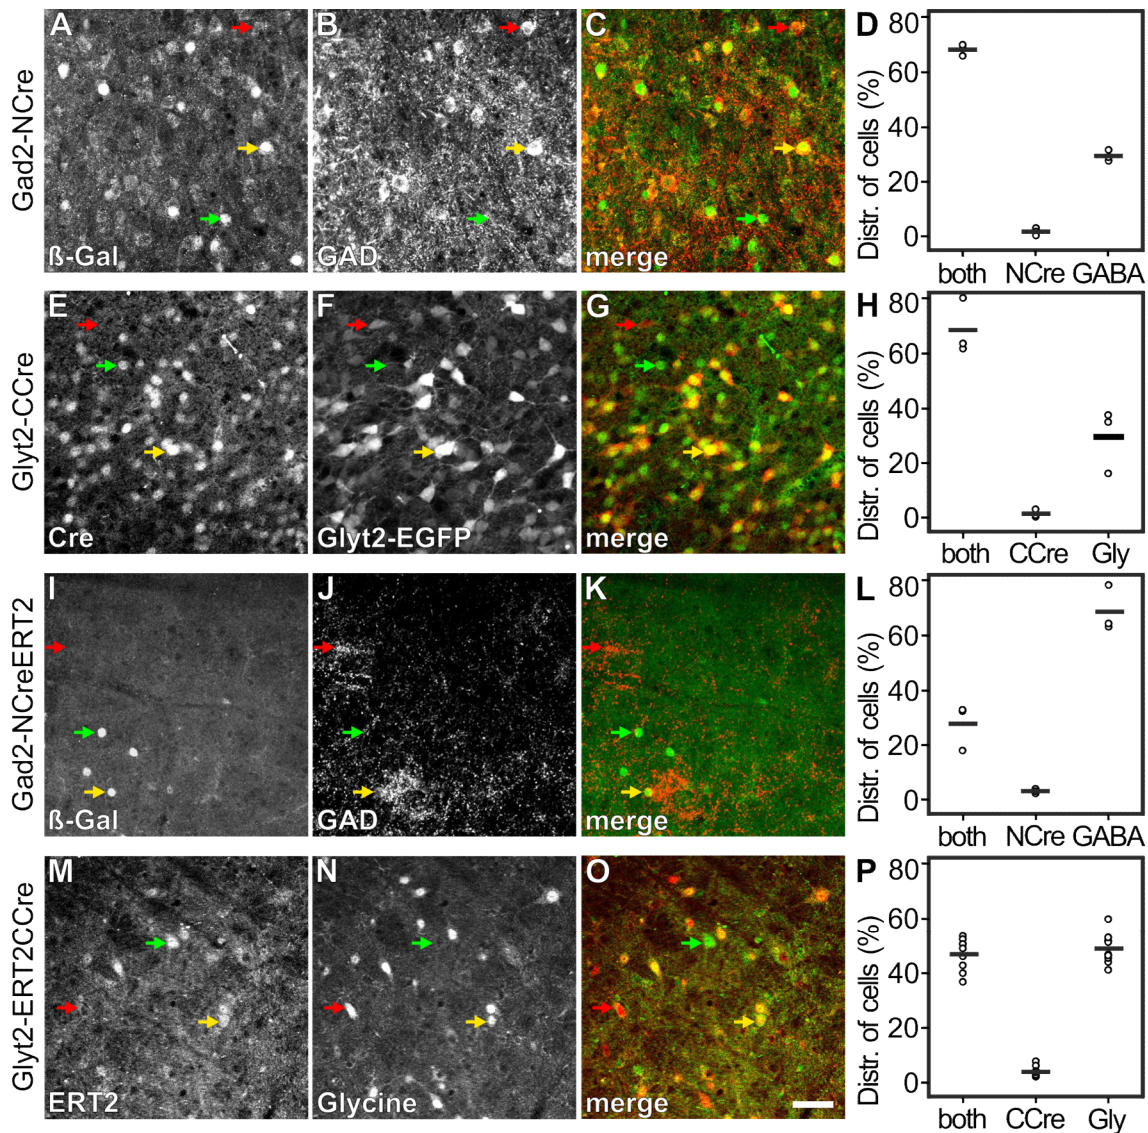

**Suppl. Fig. 2: Verification of the specificity of the expression of split-Cre proteins.** To characterize the four novel split-Cre(ERT2) transgenic mouse lines targeting GABAergic and glycinergic neurons, a transgene specific marker (NCre, NCreERT2:  $\beta$ -Gal (A, I); CCre: Cre (E); ERT2CCre: ERT2 (M)) was labelled with an appropriate antibody while the GABAergic or glycinergic phenotype was identified using immunohistochemical staining for GAD2 (B, J), EGFP expression in Glyt2-EGFP mice (F) or immunohistochemical staining for glycine (N), respectively. The overlays (C, G, K, O) show the transgene marker in green, the cell type marker in red and cells positive for both markers in yellow. Panels D, H, L, P show the quantification of cells expressing both the transgene marker and the corresponding cell type marker (both), only the transgene marker (NCre, CCre) or only the cell type marker (GABA, Gly). Importantly, only very few cells express only the transgene marker, which implies that transgene expression is specific for the targeted cell type. Analysis was performed on  $n = 3, 3, 3, 9$  mice for the Gad2-NCre, Glyt2-CCre, Gad2-NCreERT2 and Glyt2-ERT2CCre mouse lines, respectively. 527, 2783, 505 and 948 cells were counted in total for the Gad2-NCre, Glyt2-CCre, Gad2-NCreERT2 and Glyt2-ERT2CCre mouse lines, respectively. The scale bar in O corresponds to 50  $\mu$ m and applies to all panels.

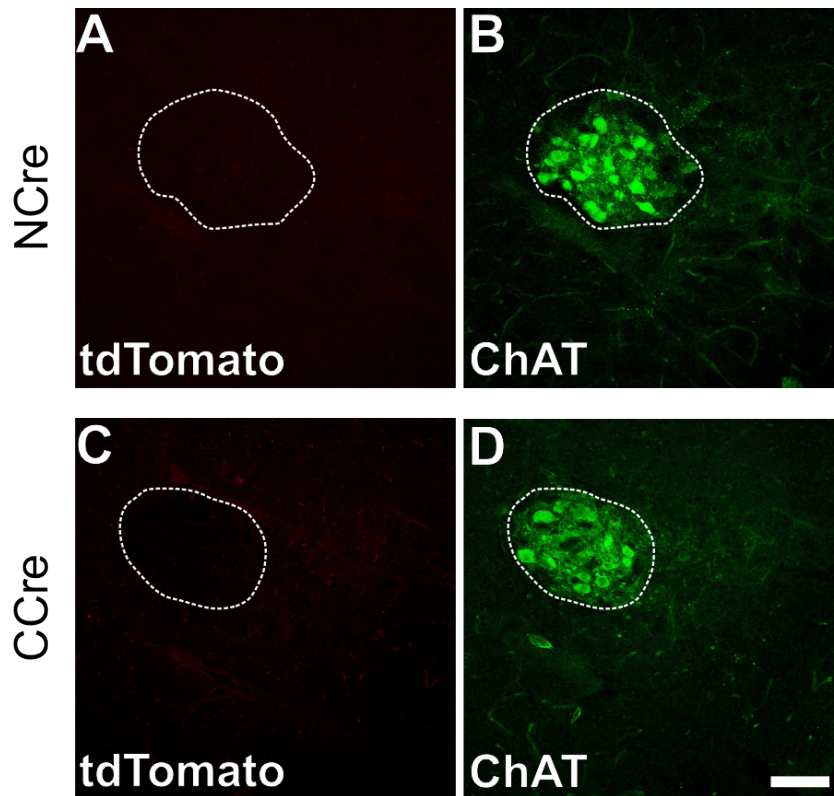

**Suppl. Fig. 3: No reporter expression is observed in mice harboring only one of the split-Cre alleles.** To test for the specificity / leakiness of split-Cre mediated DNA recombination, mice harboring (in addition to the Ai14 reporter allele) only either the Gad2-NCre (A, B) or the Glyt2-CCre allele (C, D) were analyzed for expression of the tdTomato reporter protein (A, C). However, no reporter expression was observed. Slices were costained with an antibody against choline acetyltransferase (ChAT; B, D), which labels the nucleus ambiguus, which is next to the analyzed region of the ventrolateral medulla including the preBötzinger complex. Shown are examples of a 174 days and 149 days old mouse for NCre and CCre, respectively. As these mice are older than the other mice analyzed in this study and DNA recombination is irreversible (i.e. tdTomato<sup>+</sup> cells will accumulate over time) this result strongly suggests that no DNA recombination occurs in mice containing only either the Gad2-NCre or the Glyt2-CCre allele. Scale bar: 100  $\mu$ m.





**Supplementary Table 1: Antibodies used in this study**

| Target         | Antibody                           | dilution     | Supplier               | Catalogue number | Lot            |
|----------------|------------------------------------|--------------|------------------------|------------------|----------------|
| glycine        | rat anti-glycine                   | 1:1000 (IHC) | Immunosolutions        | IG1002           | 1131           |
| Gad1           | mouse anti-GAD1                    | 1:1000 (IHC) | Millipore              | MAB5406          | 2491208        |
| Gad2           | mouse anti-GAD2                    | 1:500 (IHC)  | Millipore              | MAB351           | LV1579927      |
| Cre            | mouse anti-Cre Recombinase         | 1:1000 (IHC) | Millipore              | MAB3120          | 2387475        |
| $\beta$ -Gal   | rabbit anti- $\beta$ -Gal          | 1:2000 (IHC) | MP Biomedicals         | 855976           |                |
| ERT2           | rabbit anti-ER $\alpha$ HC-20      | 1:1000 (IHC) | SantaCruz              | sc-543           |                |
| ChAT           | goat anti-Cholinacetyl-transferase | 1:500 (IHC)  | Millipore              | AB144            | 3067431        |
| VIAAT          | rabbit anti-VIAAT                  | 1:3000 (WB)  | SynapticSystems        | 131 003          | 131003/38      |
| $\beta$ -actin | mouse anti-beta-Actin              | 1:1000 (WB)  | Sigma-Aldrich          | A5441            | 030M4788       |
|                | goat anti-rabbit-IgG Cy3           | 1:1000 (IHC) | DIANOVA                | 111-165-144      | 75692          |
|                | goat anti-mouse-IgG Cy5            | 1:1000 (IHC) | DIANOVA                | 115-175-166      | 72032 & 121792 |
|                | goat anti-rat-IgG AlexaFluor488    | 1:1000 (IHC) | Invitrogen             | A-11006          | 93C1-1         |
|                | donkey anti-goat-IgG AlexaFluor488 | 1:500 (IHC)  | DIANOVA                | 705-545-147      | 103943         |
|                | goat anti-rabbit-IgG HRP           | 8ng/ml (WB)  | Jackson ImmunoResearch | 111-035-003      | 63590          |
|                | goat anti-mouse-IgG HRP            | 8ng/ml (WB)  | Jackson ImmunoResearch | 115-035-003      | 72639          |

IHC: Immunohistochemistry; WB: Western Blot

**Supplementary Table 2: Respiratory parameters of mice with tamoxifen inducible deletion of VIAAT in GGCN.**

|                                       | p6           |                        | p127                    |                                    | Test parameter                                                                                                                                                                                             |
|---------------------------------------|--------------|------------------------|-------------------------|------------------------------------|------------------------------------------------------------------------------------------------------------------------------------------------------------------------------------------------------------|
|                                       | CTRL<br>n=10 | indVIACO<br>n=9        | CTRL<br>n=16            | indVIACO<br>n=11                   |                                                                                                                                                                                                            |
| Respiratory rate [min <sup>-1</sup> ] | 309.4 ± 13.7 | 307.4 ± 20.3<br>§0.932 | 411.4 ± 69.8<br>#<0.001 | 394.3 ± 53.1<br>§0.390,<br>#<0.001 | P <sub>NT</sub> < 0.05; P <sub>EVT</sub> < 0.05;<br>F <sub>Age</sub> 38.703; P <sub>Age</sub> < 0.001;<br>F <sub>GT</sub> 0.395; P <sub>GT</sub> 0.533;<br>F <sub>int</sub> 0.248; P <sub>int</sub> 0.621  |
| CV interval                           | 0.17 ± 0.04  | 0.15 ± 0.03<br>§0.503  | 0.43 ± 0.09<br>#<0.001  | 0.44 ± 0.13<br>§0.644,<br>#<0.001  | P <sub>NT</sub> 0.578; P <sub>EVT</sub> < 0.05;<br>F <sub>Age</sub> 110.986; P <sub>Age</sub> < 0.001;<br>F <sub>GT</sub> 0.0453; P <sub>GT</sub> 0.833;<br>F <sub>int</sub> 0.666; P <sub>int</sub> 0.419 |
| IrrScore Interval                     | 0.10 ± 0.03  | 0.08 ± 0.02<br>§0.692  | 0.29 ± 0.06<br>#<0.001  | 0.32 ± 0.10<br>§0.306,<br>#<0.001  | P <sub>NT</sub> 0.150; P <sub>EVT</sub> < 0.05;<br>F <sub>Age</sub> 125.875; P <sub>Age</sub> < 0.001;<br>F <sub>GT</sub> 0.136; P <sub>GT</sub> 0.714;<br>F <sub>int</sub> 0.952; P <sub>int</sub> 0.335  |
| Pause > 1s [min <sup>-1</sup> ]       | 0 ± 0        | 0 ± 0<br>§n.t.         | 0.04 ± 0.11<br>#n.t.    | 0.09 ± 0.21<br>§n.t.,<br>#n.t.     | P <sub>NT</sub> < 0.05; P <sub>EVT</sub> < 0.05;<br>F <sub>Age</sub> 3.100; P <sub>Age</sub> 0.086;<br>F <sub>GT</sub> 0.409; P <sub>GT</sub> 0.526;<br>F <sub>int</sub> 0.409; P <sub>int</sub> 0.526     |
| CV Amplitude                          | 0.34 ± 0.04  | 0.29 ± 0.09<br>§n.t.   | 0.27 ± 0.21<br>#n.t.    | 0.24 ± 0.04<br>§n.t.,<br>#n.t.     | P <sub>NT</sub> < 0.05; P <sub>EVT</sub> < 0.05;<br>F <sub>Age</sub> 2.072; P <sub>Age</sub> 0.157;<br>F <sub>GT</sub> 1.172; P <sub>GT</sub> 0.285;<br>F <sub>int</sub> 0.0269; P <sub>int</sub> 0.870    |
| IrrScore Amplitude                    | 0.19 ± 0.11  | 0.13 ± 0.05<br>§n.t.   | 0.20 ± 0.10<br>#n.t.    | 0.20 ± 0.05<br>§n.t.,<br>#n.t.     | P <sub>NT</sub> < 0.05; P <sub>EVT</sub> 0.661;<br>F <sub>Age</sub> 1.959; P <sub>Age</sub> 0.169;<br>F <sub>GT</sub> 1.419; P <sub>GT</sub> 0.240;<br>F <sub>int</sub> 1.216; P <sub>int</sub> 0.276      |

COTRIND mice were bred to ViaatFlx mice resulting in inducible Viaat conditional knockout animals (indVIACO). After induction of DNA recombination by tamoxifen application at p1/p2, breathing patterns were analyzed at the age of p6 and p127 using whole-body plethysmography. Data are shown as mean ± standard deviation (SD). Statistical analysis was performed with SigmaPlot 12.5 using two way ANOVA (General Linear Model; Degrees of Freedom: DF<sub>Total</sub> 45) followed by Pairwise Multiple Comparison. P<sub>NT</sub> = P-value normality test; P<sub>EVT</sub> = P-value equal variance test; F<sub>Age</sub> = F-value for comparison of age, F<sub>GT</sub> = F-value for comparison of genotype; F<sub>int</sub> = F-value for interaction; P<sub>Age</sub> = P-value for comparison of age; P<sub>GT</sub> = P-value for comparison of genotype; P<sub>int</sub> = P-value for interaction. Pairwise Multiple Comparison were performed using the Holm-Sidak method. P-values for comparison between genotype per age categories are marked as “§”. P-values for comparison between age categories are marked as “#”. n: number of animals tested from each genotype and age group. Apneas (Pause > 1 s) are calculated per minute. n.t.: not tested.
